# Supplementary material for: Recombinant human granulocyte– colony stimulating factor in women with unexplained recurrent pregnancy losses: a randomized clinical trial
Source: PubMed Central journal article supplement — Hum Reprod. 2019 Feb 18;34(3):424–32. doi: 10.1093/humrep/dey393 (PMC6389865; doi:10.1093/humrep/dey393), 2019-02-18
Supplement: dey393_supplementary_table_si.pdf [file dey393_supplementary_table_si.pdf]

Supplementary Table S1 Adverse events.

| Adverse events                                       | n (%) by Group |                 | Relative risk (95% CI) | P value |
|------------------------------------------------------|----------------|-----------------|------------------------|---------|
|                                                      | rhG-CSF        | Placebo         |                        |         |
| Total number of participants                         | 76             | 74              |                        |         |
| Participants with AE                                 | 52 (68)        | 43 (58)         |                        |         |
| Blood and lymphatic system disorders                 | 4 (5)          | 1 (1)           | 3.9 (0.4, 34.2)        | 0.22    |
| Cardiac disorders                                    | 1 (1)          | NA <sup>†</sup> | NA                     |         |
| Gastrointestinal disorders                           | 33 (43)        | 24 (32)         | 1.3 (0.9, 2.0)         | 0.17    |
| General disorders and administration site conditions | 10 (13)        | 13 (18)         | 0.7 (0.4, 1.6)         | 0.44    |
| Hepatobiliary disorders                              | 1 (1.3)        | NA              | NA                     |         |
| Immune system disorders                              | 2 (3)          | NA              | NA                     |         |
| Infections and infestations                          | 16 (21)        | 10 (14)         | 1.6 (0.8, 3.2)         | 0.23    |
| Injury, poisoning and procedural complications       | 2 (3)          | 3 (4)           | 0.6 (0.1, 3.7)         | 0.63    |
| Significantly deranged serum parameters              | 8 (11)         | 5 (7)           | 1.6 (0.5, 4.6)         | 0.42    |
| Musculoskeletal and connective tissue disorders      | 20 (26)        | 6 (8.1)         | 3.2 (1.4, 7.5)         | 0.01    |
| Nervous system disorders                             | 21 (28)        | 14 (19)         | 1.5 (0.8, 2.6)         | 0.22    |
| Pregnancy, puerperium and perinatal conditions       | 8 (11)         | 4 (5)           | 2.0 (0.6, 6.1)         | 0.25    |
| Psychiatric disorders                                | 1 (1)          | NA              | NA                     |         |
| Renal and urinary disorders                          | 1 (1)          | 1 (1)           | 1.0 (0.1, 15.5)        | 0.99    |
| Reproductive system and breast disorders             | 19 (25)        | 1 (15)          | 1.7 (0.9, 3.3)         | 0.13    |
| Respiratory, thoracic and mediastinal disorders      | 4 (5)          | 2 (3)           | 1.9 (0.4, 10.3)        | 0.44    |
| Skin and subcutaneous tissue disorders               | 8 (11)         | 2 (3)           | 3.9 (0.9, 17.8)        | 0.08    |
| Vascular disorders                                   | 1 (1)          | 1 (1)           | 1.0 (0.1, 15.2)        | 0.98    |

Among these, serious adverse events in the rhG-CSF group comprised of two occurrences of gastrointestinal disorders, a diagnosis of lower respiratory tract infection and one occurrence of severe headache, whereas serious adverse events in the placebo group comprised of a diagnosis of pneumonia and a diagnosis of endometritis.

<sup>†</sup>NA indicates there were no events in the group.

Please note that this table is a summary of all adverse events. Some participants had multiple system involvement and therefore numbers in each system class will not add up to the total number of participants with AE.
