# Supplementary material for: Recombinant human granulocyte– colony stimulating factor in women with unexplained recurrent pregnancy losses: a randomized clinical trial
Source: PubMed Central journal article supplement — Hum Reprod. 2019 Feb 18;34(3):424–32. doi: 10.1093/humrep/dey393 (PMC6389865; doi:10.1093/humrep/dey393), 2019-02-18
Supplement: dey393_supplementary_table_sii.pdf [file dey393_supplementary_table_sii.pdf]

**Supplementary Table SII Subgroup analyses of primary endpoint.**

| Subgroup                     | n/N (%) by group |            | Relative risk (95% CI) | P value |
|------------------------------|------------------|------------|------------------------|---------|
|                              | rhG-CSF          | Placebo    |                        |         |
| Age*                         |                  |            |                        |         |
| <35 years                    | 36/62 (58)       | 40/60 (67) | 0.9 (0.7, 1.2)         | 0.33    |
| ≥35 years                    | 9/14 (64)        | 8/14 (57)  | 1.1 (0.6, 2.1)         | 0.71    |
| Previous miscarriages        |                  |            |                        |         |
| 3                            | 23/36 (64)       | 23/34 (68) | 0.9 (0.7, 1.3)         | 0.67    |
| 4                            | 12/16 (75)       | 13/20 (65) | 1.3 (0.8, 2.0)         | 0.26    |
| 5                            | 4/7 (57)         | 4/10 (40)  | 1.3 (0.5, 3.6)         | 0.58    |
| >5                           | 6/17 (35)        | 8/10 (80)  | 0.5 (0.2, 1.0)         | 0.06    |
| Gestation at treatment start |                  |            |                        |         |
| ≤4 weeks                     | 42/72 (58.)      | 44/68 (65) | 0.9 (0.7, 1.2)         | 0.43    |
| >4 weeks                     | 3/4 (75)         | 4/6 (67)   | 1.1 (0.6, 2.1)         | 0.73    |

\*Maternal age at time of randomization.
