# Supplementary material for: Recombinant human granulocyte– colony stimulating factor in women with unexplained recurrent pregnancy losses: a randomized clinical trial
Source: PubMed Central journal article supplement — Hum Reprod. 2019 Feb 18;34(3):424–32. doi: 10.1093/humrep/dey393 (PMC6389865; doi:10.1093/humrep/dey393), 2019-02-18
Supplement: dey393_supplementary_table_siii.pdf [file dey393_supplementary_table_siii.pdf]

**Supplementary Table SIII Trial recruitment number by centers.**

| <b>Center</b>                                | <b>PI</b>    | <b>Screened</b> | <b>Randomized</b> |
|----------------------------------------------|--------------|-----------------|-------------------|
| Liverpool Womens Hospital                    | Dawood       | 30              | 19                |
| Birmingham Heartlands Hospital               | Gupta        | 49              | 17                |
| University Hospital Coventry                 | Quenby       | 31              | 17                |
| St Mary's Hospital Manchester                | Mohiyiddeen  | 28              | 9                 |
| St Mary's Hospital London                    | Rai          | 21              | 9                 |
| James Cook University Hospital Middlesbrough | Manda        | 20              | 9                 |
| Queens Medical Centre Nottingham             | Moore        | 15              | 9                 |
| St James' Hospital Leeds                     | Shillito     | 17              | 7                 |
| Southampton General Hospital                 | Cheong       | 15              | 7                 |
| Newcastle Royal Victoria Infirmary           | Stewart      | 12              | 7                 |
| Birmingham Women's Hospital                  | Coomarasamy  | 23              | 6                 |
| Sunderland Royal Hospital                    | Ahmed        | 10              | 6                 |
| Oxford John Radcliffe Hospital               | Granne       | 10              | 6                 |
| Royal Infirmary of Edinburgh                 | Horne        | 16              | 5                 |
| Plymouth Derriford Hospital                  | Bhattacharya | 8               | 5                 |
| Ashford St Peter's Hospital                  | Bass         | 9               | 4                 |
| Frimley Park Hospital                        | Chandra      | 8               | 4                 |
| Guy's Hospital London                        | Khalaf       | 9               | 3                 |
| South Tyneside Hospital                      | Al-Inizi     | 3               | 1                 |
| Wansbeck Hospital                            | Raheja       | 4               | 0                 |
| Royal Stoke Hospital                         | Misra        | 2               | 0                 |
| <b>TOTAL</b>                                 |              | <b>340</b>      | <b>150</b>        |
